# Supplementary material for: Calcium-dependent cytosolic phospholipase A2 activation is implicated in neuroinflammation and oxidative stress associated with ApoE4
Source: Research Square preprint supplement (doi:10.21203/rs.3.rs-68804/v3), 2021-02-12
Supplement: Supplementary file 1 [file c79e8ba57af19b6d71f5ea37.docx]

**Supplementary Table 1.**

| Regions sampled and source | Hippocampus, USC ADRC | |
| --- | --- | --- |
| Clinical diagnosis | NCI | AD |
| Genotype | E3/E3 | E4/E4 |
| Sample size, n | 6 | 6 |
| Age (years ± SD) * | 85±5 | 75±5 |
| Sex (n, female/male) * | 5/1 | 4/2 |
| Braak stage | I | V |

*****Age and sex did not differ between groups compared using ANOVA. NCI=no cognitive impairment. AD=Alzheimer's disease.
